# Supplementary material
Source: Research Square preprint supplement (doi:10.21203/rs.3.rs-8704689/v1)
Supplement: Supplementary file 1 [file 127ef04821b46ba4ef9f8e55.docx]

**Supplemental figure and table legends:**

**Additional file 1: Figure S1.** GenomeScope plots of the genome of *Cinnamomum cassia* var. *cassia*.

**Additional file 2: Figure S2.** Diagram illustrating the filtering process of the whole-genome resequencing data.

**Additional file 3: Figure S3. TreeMix analyses among macro, cassia-FCG and cassia-MDA.**

**Additional file 4: Figure S4.** Genetic differentiation (*FST*) between Chinese and Vietnamese cinnamon in 25-kb non-overlapping sliding windows across all chromosomes.

**Additional file 5: Figure S5. Demographic history of** *C. cassia* **var. *cassia* (Cassia-MDA) and** *C. cassia* **var. *macrophyllum* (macro) inferred with PSMC.**

**Additional file 6: Figure S6.** Concentrations of three cinnamaldehyde derivatives (trans-cinnamaldehyde, 2-hydroxycinnamaldehyde, and 2-methoxycinnamaldehyde) across various tissues of *C. cassia* var. *cassia*.

**Additional file 7: Figure S7. Chromosomal localization of OMTs (red line) in** *Cinnamomum cassia* var. *cassia***.**

**Additional file 8: Table S1.** Summary of the sequencing data of *C. cassia* var. *cassia* generated in the present study.

**Additional file 9: Table S2.** Assembly and annotation statistics of *C. cassia* var. *cassia* genome.

**Additional file 10: Table S3.** Details of the sample locations, Q values at K=3 in STRUCTURE (dataset D1).

**Additional file 11: Table S4.** Dsuite analyses did not detect any significant gene flow among cassia-FCG, cassia-MDA, and macro.

**Additional file 12: Table S5.** Significantly abundant volatile metabolites (relative content >1%) across five tissues in Chinese cinnamon (*C. cassia* var. *cassia*).

**Additional file 13: Table S6.** Concentrations (μg/mg) of three cinnamaldehyde derivatives across various tissues of two *C. cassia* varieties.

**Additional file 14: Table S7.** Experimentally verified plant OMTs used in the reconstruction of the phylogenetic tree.

**Additional file 15: Table S8.** A list of all primers used for CDS cloning in this study.

**Supplemental Figures:**


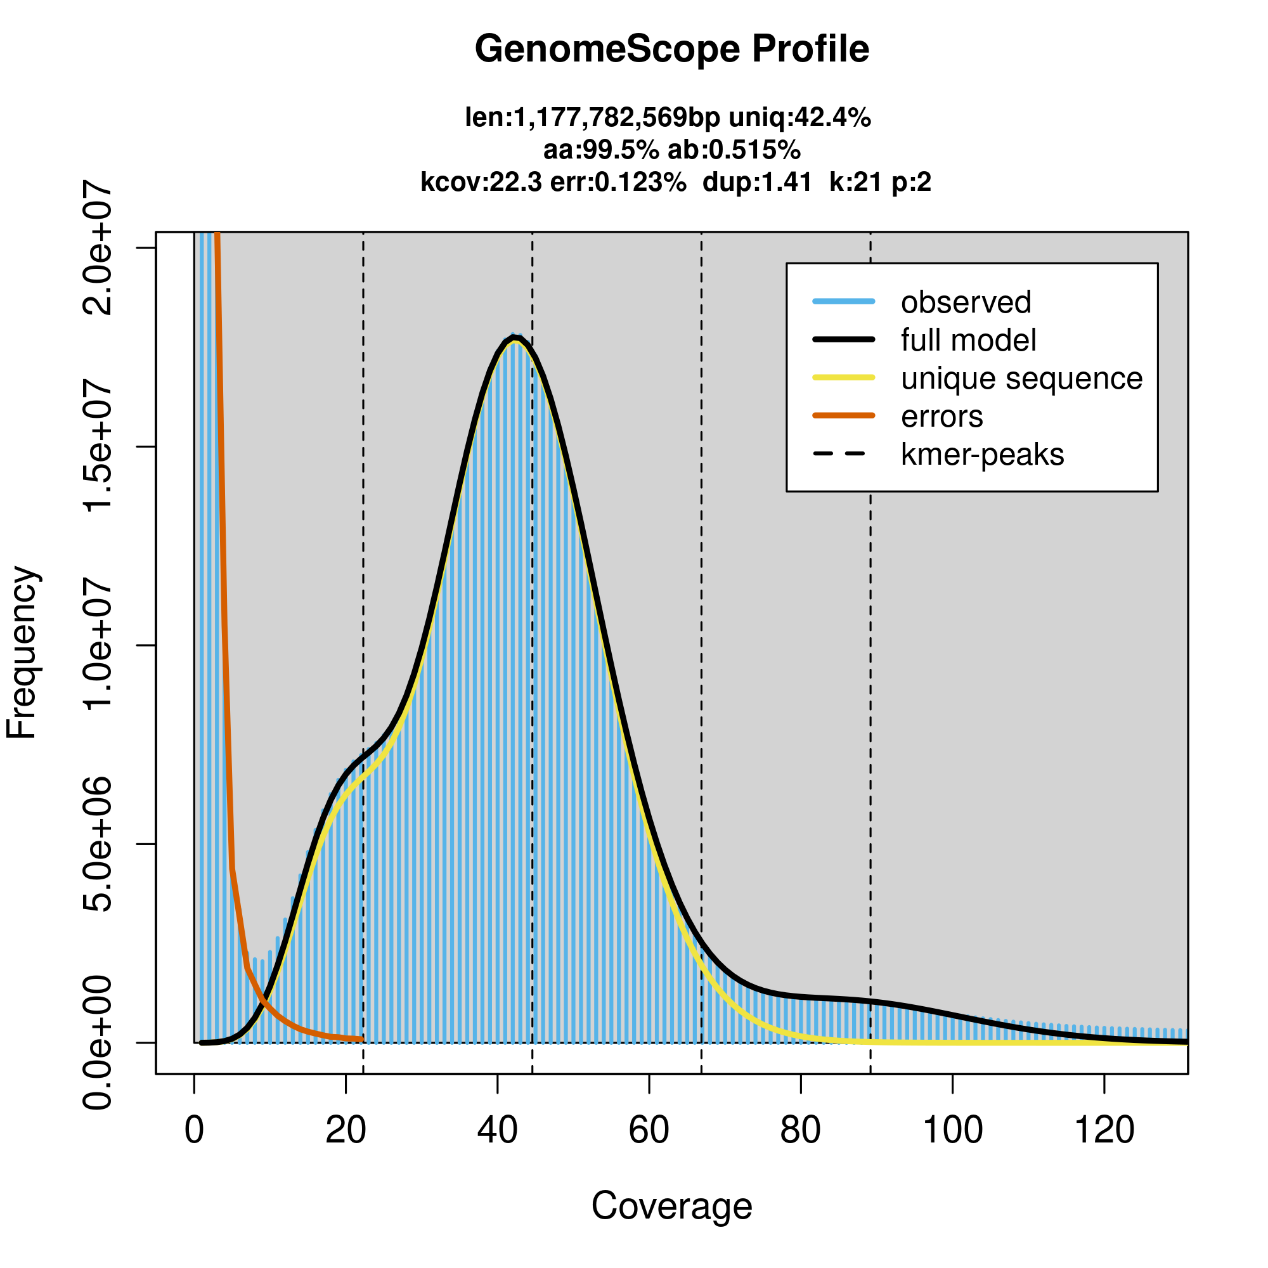


**Additional file 1: Figure S1. GenomeScope plots of** t**he genome of *Cinnamomum cassia* var. *cassia*.**


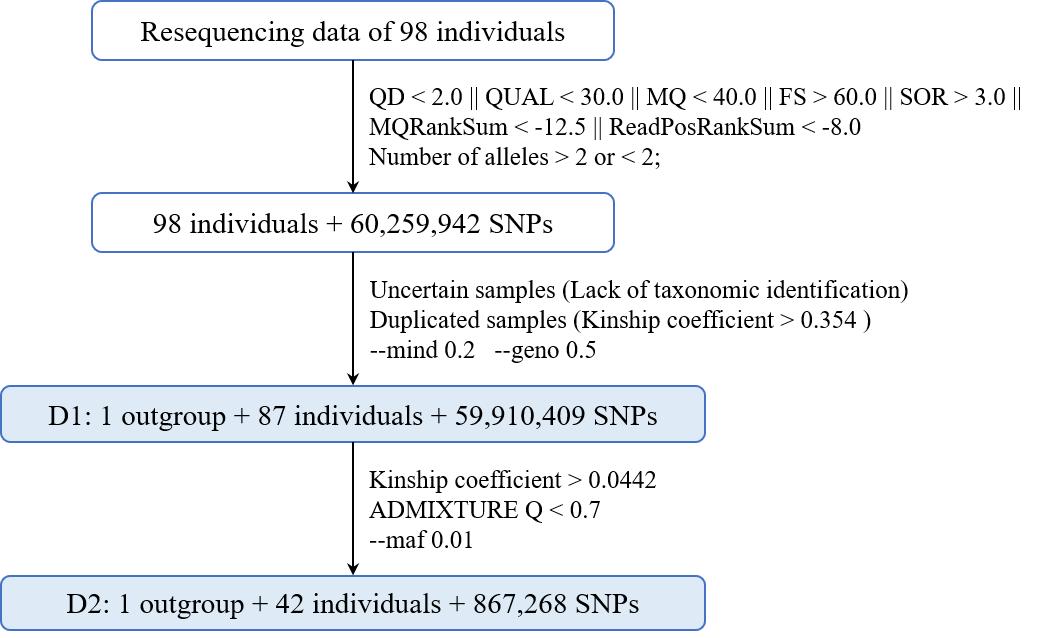


**Additional file 2: Figure S2. Diagram illustrating the filtering process of the whole-genome resequencing data.**


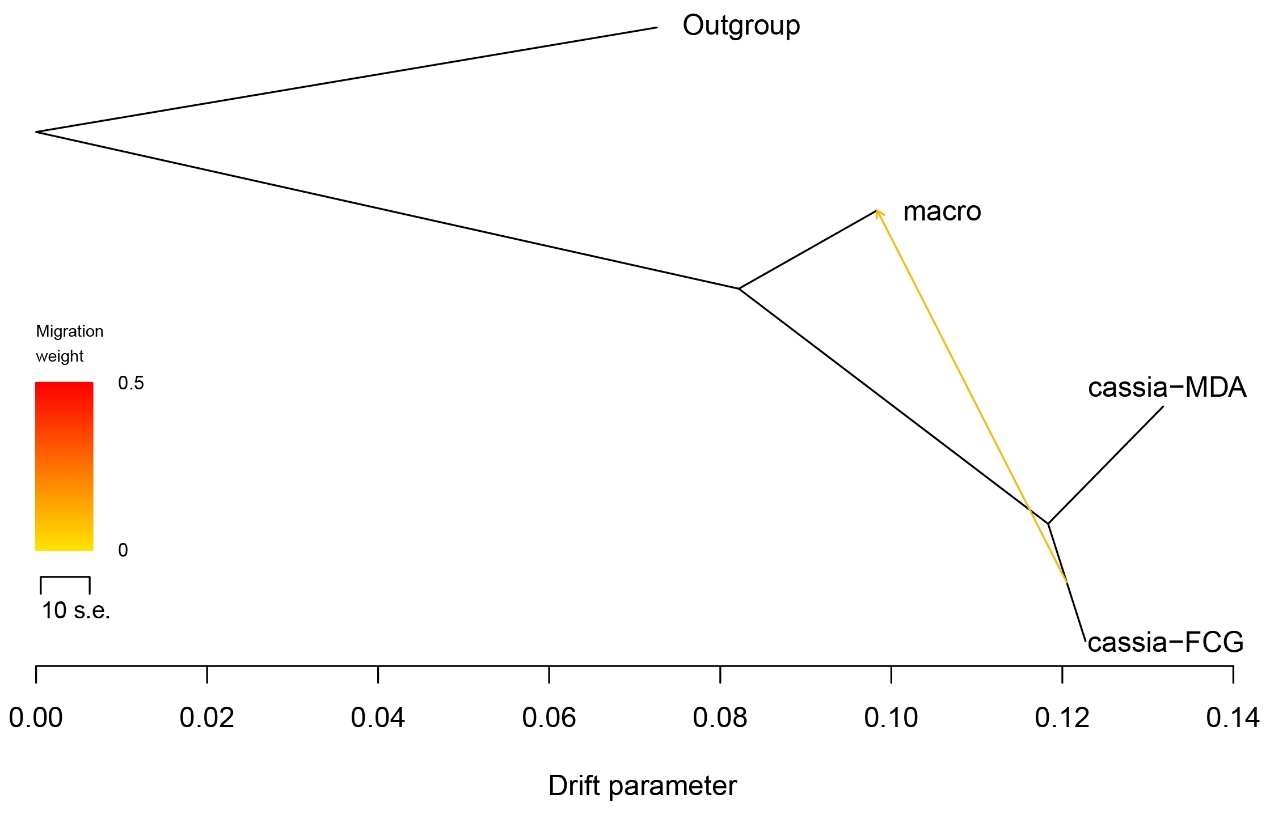


**Additional file 3: Figure S3. A very weak gene flow from cassia-FCG to macro identified in the TreeMix analyses. The arrow indicates the migration direction.**


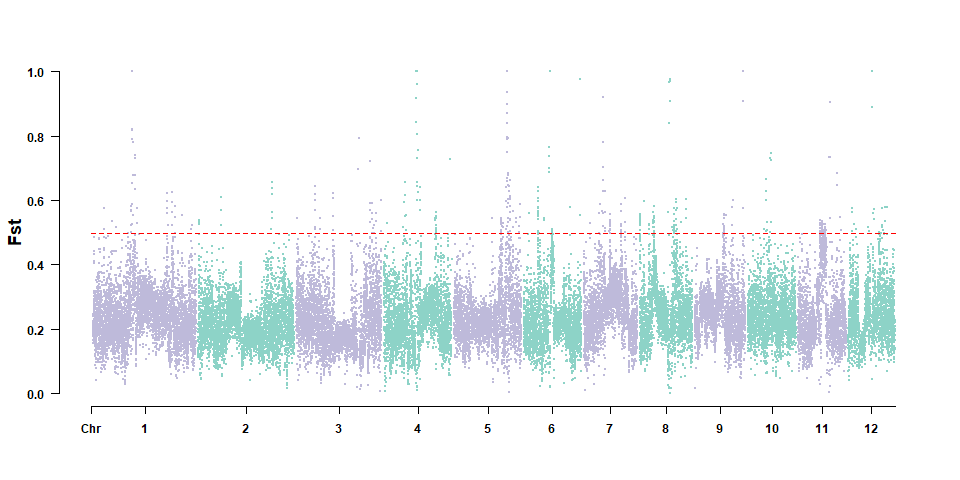


**Additional file 4: Figure S4. Genetic differentiation (*FST*) between Chinese and Vietnamese cinnamon in 25-kb non-overlapping sliding windows across all chromosomes. Red horizontal lines represent the top 1% *FST* (0.499).**


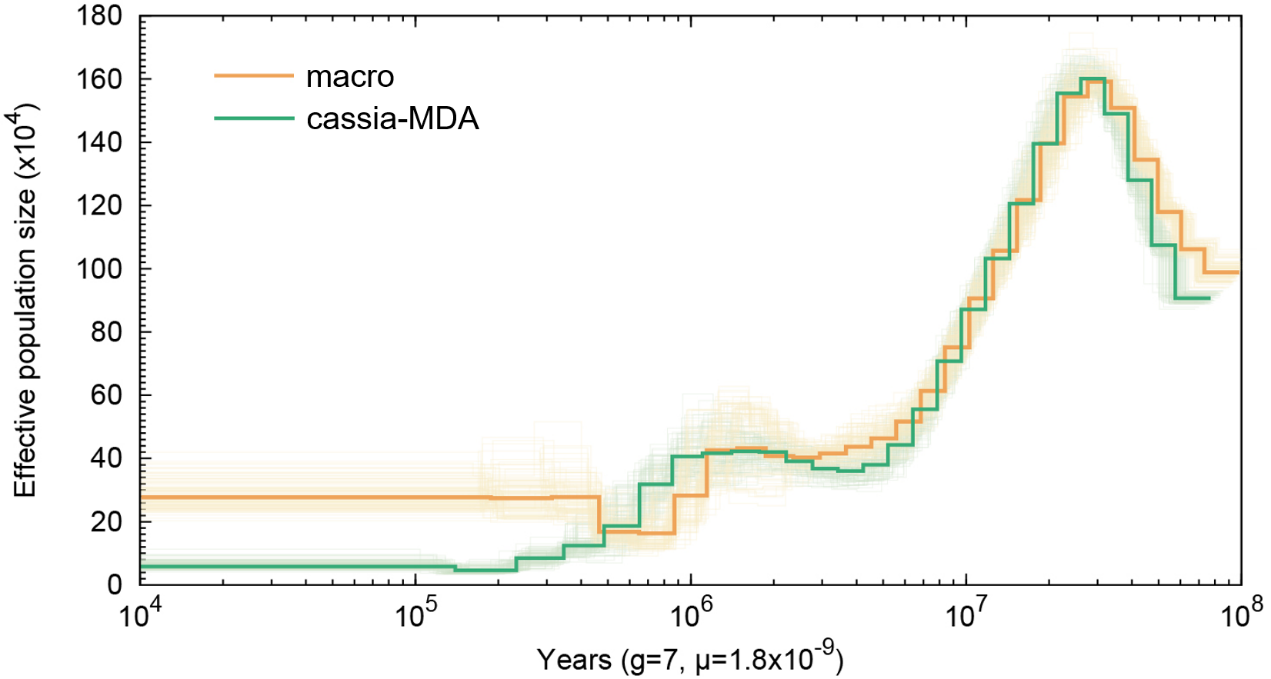


**Additional file 5: Figure S5. Demographic history of *C. cassia* var. *cassia* (Cassia-MDA) and *C. cassia* var. *macrophyllum* (macro) inferred with PSMC.**


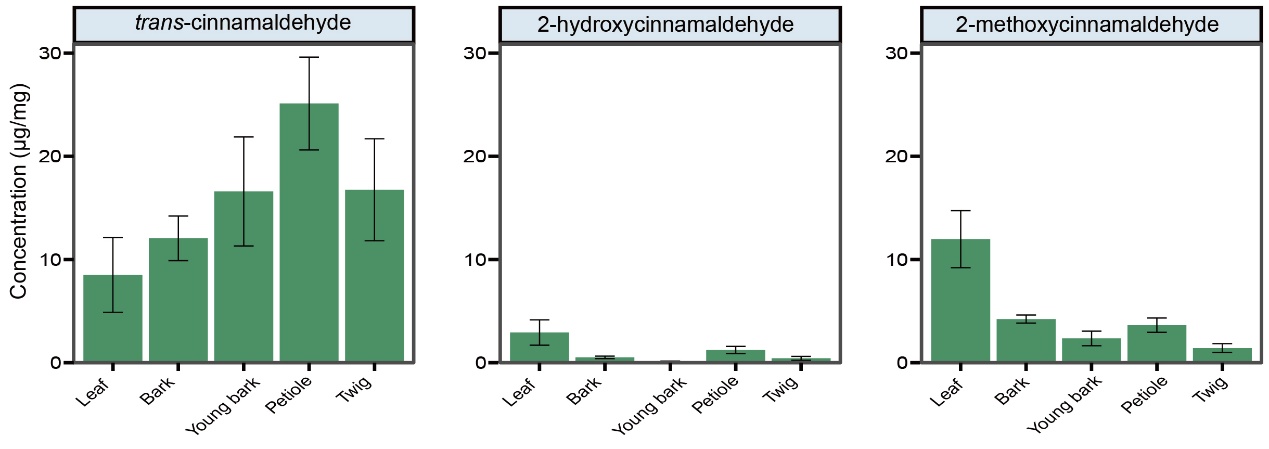


**Additional file 6: Figure S6. Concentrations of three cinnamaldehyde derivatives (trans-cinnamaldehyde, 2-hydroxycinnamaldehyde, and 2-methoxycinnamaldehyde) across various tissues of *C. cassia* var. *cassia*. Original concentration data are provided in Table S6.**


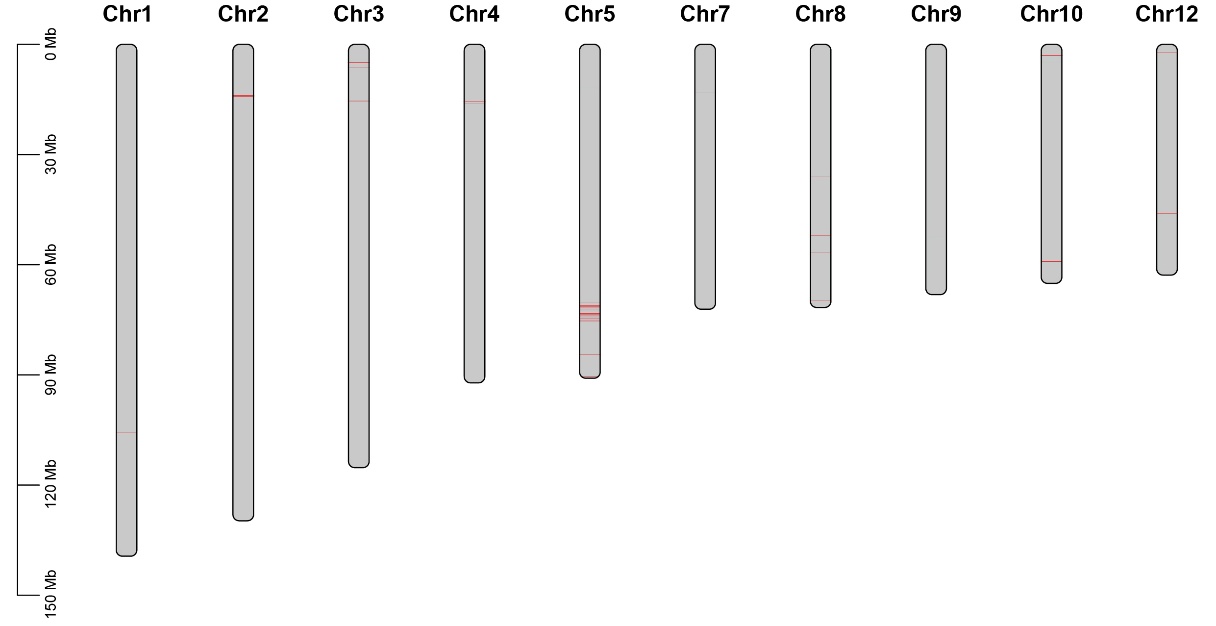


**Additional file 7: Figure S7. Chromosomal localization of OMTs (red line) in *C. cassia* var. *cassia*.** **The scale on the left was based on megabytes (Mb). The number of chromosomes was indicated at the top of each column.**
